# Supplementary material for: Contract Theory: Impact on Biopharmaceutical Alliance Structure and Performance
Source: Atypon-hosted journal article supplement (doi:10.1287/msom.2017.0617), 2017-06-29
Supplement: msom.2017.0617-sm.pdf [file msom.2017.0617-sm.pdf]

# Supplemental Materials for: Contract Theory: Implications for Biopharmaceutical Alliance Structure and Performance

---

This supplemental file contains:

1) Cross-correlation table with standard errors reported in brackets:

None of the pairwise correlation coefficients are too high.

2) A table of Variance Inflation Factors (VIFs):

None of the variance inflation factors are too high. As logistic regression does not generate VIFs, these values were generated using the corresponding regression model for alliance structure.

## 1. Appendix

Table 1 Cross-correlation table

| Variables                | 1                 | 2                 | 3                 | 4                 | 5                 | 6                 | 7                 | 8                 | 9                 | 10                | 11                | 12                | 13                | 14                | 15                | 16    |
|--------------------------|-------------------|-------------------|-------------------|-------------------|-------------------|-------------------|-------------------|-------------------|-------------------|-------------------|-------------------|-------------------|-------------------|-------------------|-------------------|-------|
| 1.year                   | 1.000             |                   |                   |                   |                   |                   |                   |                   |                   |                   |                   |                   |                   |                   |                   |       |
| 2.deal_value             | 0.339<br>(0.000)  | 1.000             |                   |                   |                   |                   |                   |                   |                   |                   |                   |                   |                   |                   |                   |       |
| 3.exclusive              | 0.054<br>(0.013)  | 0.109<br>(0.000)  | 1.000             |                   |                   |                   |                   |                   |                   |                   |                   |                   |                   |                   |                   |       |
| 4.worldwide              | -0.017<br>(0.448) | 0.083<br>(0.000)  | 0.392<br>(0.000)  | 1.000             |                   |                   |                   |                   |                   |                   |                   |                   |                   |                   |                   |       |
| 5.innov_size             | -0.034<br>(0.117) | 0.068<br>(0.002)  | -0.004<br>(0.856) | -0.026<br>(0.228) | 1.000             |                   |                   |                   |                   |                   |                   |                   |                   |                   |                   |       |
| 6.innov_private          | 0.023<br>(0.288)  | 0.001<br>(0.960)  | 0.010<br>(0.634)  | -0.035<br>(0.108) | -0.169<br>(0.000) | 1.000             |                   |                   |                   |                   |                   |                   |                   |                   |                   |       |
| 7.partner_size           | 0.001<br>(0.973)  | 0.204<br>(0.000)  | -0.064<br>(0.004) | 0.045<br>(0.037)  | -0.125<br>(0.000) | -0.019<br>(0.372) | 1.000             |                   |                   |                   |                   |                   |                   |                   |                   |       |
| 8.partner_private        | -0.083<br>(0.000) | -0.098<br>(0.000) | -0.005<br>(0.834) | -0.067<br>(0.002) | -0.029<br>(0.177) | -0.049<br>(0.024) | -0.207<br>(0.000) | 1.000             |                   |                   |                   |                   |                   |                   |                   |       |
| 9.alliance_experience    | 0.024<br>(0.267)  | 0.170<br>(0.000)  | -0.013<br>(0.554) | 0.118<br>(0.000)  | -0.071<br>(0.001) | -0.009<br>(0.696) | 0.629<br>(0.000)  | -0.165<br>(0.000) | 1.000             |                   |                   |                   |                   |                   |                   |       |
| 10.innov_law_score       | -0.061<br>(0.005) | 0.014<br>(0.513)  | -0.011<br>(0.616) | 0.060<br>(0.006)  | -0.102<br>(0.000) | -0.042<br>(0.054) | 0.016<br>(0.451)  | 0.023<br>(0.298)  | -0.011<br>(0.622) | 1.000             |                   |                   |                   |                   |                   |       |
| 11.part_law_score        | -0.106<br>(0.000) | 0.034<br>(0.119)  | -0.046<br>(0.034) | 0.091<br>(0.000)  | 0.083<br>(0.000)  | -0.017<br>(0.439) | 0.037<br>(0.090)  | -0.092<br>(0.000) | 0.161<br>(0.000)  | 0.124<br>(0.000)  | 1.000             |                   |                   |                   |                   |       |
| 12.relative_industry_exp | -0.009<br>(0.664) | 0.075<br>(0.001)  | -0.028<br>(0.204) | 0.036<br>(0.095)  | -0.347<br>(0.000) | 0.062<br>(0.005)  | 0.553<br>(0.000)  | -0.061<br>(0.005) | 0.384<br>(0.000)  | 0.035<br>(0.109)  | -0.030<br>(0.166) | 1.000             |                   |                   |                   |       |
| 13.diff_country          | 0.073<br>(0.001)  | 0.026<br>(0.236)  | 0.053<br>(0.015)  | -0.147<br>(0.000) | 0.073<br>(0.001)  | -0.002<br>(0.935) | 0.034<br>(0.116)  | 0.015<br>(0.478)  | -0.041<br>(0.060) | -0.062<br>(0.004) | -0.129<br>(0.000) | -0.006<br>(0.783) | 1.000             |                   |                   |       |
| 14.bio_to_other          | -0.050<br>(0.022) | 0.091<br>(0.000)  | -0.034<br>(0.118) | 0.004<br>(0.859)  | -0.230<br>(0.000) | 0.034<br>(0.117)  | 0.571<br>(0.000)  | -0.094<br>(0.000) | 0.445<br>(0.000)  | 0.051<br>(0.020)  | 0.098<br>(0.000)  | 0.448<br>(0.000)  | 0.064<br>(0.003)  | 1.000             |                   |       |
| 15.risk                  | 0.003<br>(0.898)  | -0.074<br>(0.001) | -0.087<br>(0.000) | -0.045<br>(0.039) | -0.060<br>(0.006) | -0.006<br>(0.778) | -0.015<br>(0.500) | -0.037<br>(0.094) | -0.041<br>(0.061) | 0.009<br>(0.683)  | 0.018<br>(0.398)  | 0.025<br>(0.255)  | -0.017<br>(0.432) | 0.036<br>(0.094)  | 1.000             |       |
| 16.npd_cycle             | 0.226<br>(0.000)  | 0.114<br>(0.000)  | 0.164<br>(0.000)  | -0.196<br>(0.000) | 0.178<br>(0.000)  | -0.041<br>(0.062) | -0.114<br>(0.000) | 0.017<br>(0.430)  | -0.156<br>(0.000) | -0.030<br>(0.165) | -0.082<br>(0.000) | -0.178<br>(0.000) | 0.097<br>(0.000)  | -0.130<br>(0.000) | -0.103<br>(0.000) | 1.000 |

Significance levels in parentheses

---

## VIF Table

**Table 2 Variance Inflation Factors (VIFs)**

| <b>Variable</b>       | <b>VIF</b> |
|-----------------------|------------|
| partner_size          | 2.44       |
| alliance_experience   | 1.80       |
| relative_industry_exp | 1.68       |
| bio_to_other          | 1.65       |
| worldwide             | 1.36       |
| exclusive             | 1.32       |
| innov_size            | 1.27       |
| npd_cycle             | 1.27       |
| deal_value            | 1.24       |
| year                  | 1.23       |
| part_law_score        | 1.12       |
| partner_private       | 1.08       |
| diff_country          | 1.08       |
| innov_law_score       | 1.05       |
| innov_private         | 1.04       |
| risk                  | 1.03       |
| Mean VIF              | 1.35       |
